# Supplementary material
Source: HighWire-hosted journal article supplement (https://ajnr-sso.highwirestaging.com/highwire/filestream/100021/field_highwire_adjunct_files/0/0286.pdf)
Supplement: 0286.pdf [file 0286.pdf]

**Supplemental table I. dAVF location per patient (sub-)group**

|                                      | All patients | dAVF and CVT            | dAVF only                |
|--------------------------------------|--------------|-------------------------|--------------------------|
| <b>dAVF location</b>                 | <b>n=178</b> | <b>n=55<sup>†</sup></b> | <b>n=123<sup>‡</sup></b> |
| Superior sagittal sinus              | 5/178 (3)    | 3/55 (6)                | 2/123 (2)                |
| Lateral sinus (sigmoid + transverse) | 62/178 (35)  | 35/55 (64)              | 27/123 (22)              |
| Straight sinus                       | 0/178        | 0/55                    | 0/123                    |
| Deep venous system <sup>§</sup>      | 10/178 (6)   | 2/55 (4)                | 8/123 (7)                |
| Cortical vein <sup>¶</sup>           | 44/178 (25)  | 7/55 (13)               | 37/123 (30)              |
| Cavernous sinus                      | 30/178 (17)  | 12/55 (22)              | 18/123 (15)              |
| Hypoglossal/condylar vein            | 6/178 (3)    | 0/55                    | 6/123 (5)                |
| Torcula/confluence of sinuses        | 13/178 (7)   | 6/55 (11)               | 7/123 (6)                |
| Other                                | 31/178 (17)  | 4/55 (7)                | 27/123 (22)              |

<sup>†</sup>8 patients had 2 dAVFs, 1 patient had 3 dAVFs, 1 patient had 5 dAVFs. <sup>‡</sup>6 patients had 2 dAVFs, 1 patient had 4 dAVFs.

<sup>§</sup>Deep venous system: Galen's vein, Basal vein of Rosenthal, internal cerebral vein, inferior sagittal sinus, thalamo-striate or caudate veins.

<sup>¶</sup>Cortical veins: temporal vein, vein of Labe, frontal vein, parietal vein.

Abbreviations: dAVF = dural arteriovenous fistula, CVT = cerebral venous thrombosis

**Supplemental table II. CVT location in patients with dAVF**

| CVT location                                   | dAVF and CVT      |
|------------------------------------------------|-------------------|
|                                                | n=55              |
| Superior sagittal sinus                        | 1/55 (2)          |
| Sigmoid sinus                                  | 28/55 (51)        |
| Transverse sinus                               | 26/55 (47)        |
| Straight sinus                                 | 2/55 (4)          |
| Cortical veins <sup>†</sup>                    | 4/55 (7)          |
| Cavernous sinus                                | 6/55 (11)         |
| Deep venous system <sup>‡</sup>                | 2/55 (4)          |
| Jugular vein                                   | 4/55 (9)          |
| Hypoglossal/condylar vein                      | 0/55              |
| Superior ophthalmic vein                       | 13/55 (24)        |
| Torcula/confluence of sinuses                  | 0/55              |
| Other                                          | 1/55 (2)          |
| <i>No. of patients with multiple locations</i> | <i>26/55 (47)</i> |

<sup>†</sup>Cortical veins: temporal vein, vein of Labe, frontal vein, parietal vein.

<sup>‡</sup>Deep venous system: Galen's vein, Basal vein of Rosenthal, internal cerebral vein, inferior longitudinal sinus, thalamo-striate or caudate veins.

Abbreviations: CVT = cerebral venous thrombosis

**Supplemental table III. Clinical presentation of subsequent CVT**

| <b>Clinical symptoms</b>   | <b>CVT following<br/>dAVF treatment<br/>(n=11)</b> | <b>CVT following<br/>conservative dAVF<br/>treatment (n=7)</b> |
|----------------------------|----------------------------------------------------|----------------------------------------------------------------|
| None/asymptomatic          | 5/11 (46)                                          | 3/7 (43)                                                       |
| Headache                   | 3/11 (27)                                          | 4/7 (57)                                                       |
| Focal neurological deficit | 1/11 (9)                                           | 0/7                                                            |
| Proptosis                  | 0/11                                               | 2/7 (29)                                                       |
| Reduced visual acuity      | 3/11 (27)                                          | 1/6 (17)                                                       |
| Diplopia                   | 1/11 (9)                                           | 2/7 (29)                                                       |
| Eye movement disorder      | 1/11 (9)                                           | 2/7 (29)                                                       |

*Abbreviations: dAVF = dural arteriovenous fistula, CVT = cerebral venous thrombosis*
